# Supplementary material for: Metabolome and transcriptome analyses reveal quality change in the orange-rooted Salvia miltiorrhiza (Danshen) from cultivated field
Source: Chin Med. 2019 Oct 2;14:42. doi: 10.1186/s13020-019-0265-6 (PMC6775661; doi:10.1186/s13020-019-0265-6)
Supplement: Supplementary file 4 — Additional file 4: Table S3. KEGG pathway enrichment analysis of DEGs in normal and orange Danshen with padj < 0.05. [file 13020_2019_265_MOESM4_ESM.xlsx]

## Sheet: ZvsC_down.DEG_KEGG_pathway_enri
KEGG pathway enrichment of down-regulated gene in orange Danshen
##Databases: KEGG PATHWAY
##Statistical test method: hypergeometric test / Fisher's exact test
##FDR correction method: Benjamini and Hochberg
#Term	Database	ID	Input number	Background number	P-Value	Corrected P-Value	Input	Hyperlink
Taurine and hypotaurine metabolism	KEGG PATHWAY	ko00430	1	28	0.00688016	0.0389911	c88430_g1	http://www.genome.jp/kegg-bin/show_pathway?ko00430/K00681%09red
Arachidonic acid metabolism	KEGG PATHWAY	ko00590	1	42	0.0101863	0.0389911	c94200_g2	http://www.genome.jp/kegg-bin/show_pathway?ko00590/K08726%09red
Chloroalkane and chloroalkene degradation	KEGG PATHWAY	ko00625	1	52	0.0125418	0.0389911	c94200_g2	http://www.genome.jp/kegg-bin/show_pathway?ko00625/K08726%09red
Cyanoamino acid metabolism	KEGG PATHWAY	ko00460	1	65	0.0155964	0.0389911	c88430_g1	http://www.genome.jp/kegg-bin/show_pathway?ko00460/K00681%09red
Pancreatic secretion	KEGG PATHWAY	ko04972	1	148	0.0348992	0.0696155	c85232_g4	http://www.genome.jp/kegg-bin/show_pathway?ko04972/K07901%09red
Peroxisome	KEGG PATHWAY	ko04146	1	194	0.0454498	0.0696155	c94200_g2	http://www.genome.jp/kegg-bin/show_pathway?ko04146/K08726%09red
Glutathione metabolism	KEGG PATHWAY	ko00480	1	213	0.0497773	0.0696155	c88430_g1	http://www.genome.jp/kegg-bin/show_pathway?ko00480/K00681%09red
Estrogen signaling pathway	KEGG PATHWAY	ko04915	1	268	0.0622048	0.0696155	c87239_g3	http://www.genome.jp/kegg-bin/show_pathway?ko04915/K09571%09red
AMPK signaling pathway	KEGG PATHWAY	ko04152	1	270	0.0626539	0.0696155	c85232_g4	http://www.genome.jp/kegg-bin/show_pathway?ko04152/K07901%09red
Plant-pathogen interaction	KEGG PATHWAY	ko04626	1	361	0.0828862	0.0828862	c94317_g2	http://www.genome.jp/kegg-bin/show_pathway?ko04626/K13457%09red

## Sheet: ZvsC_up.DEG_KEGG_pathway_enrich
KEGG pathway enrichment of up-regulated gene in orange Danshen
##Databases: KEGG PATHWAY
##Statistical test method: hypergeometric test / Fisher's exact test
##FDR correction method: Benjamini and Hochberg
#Term	Database	ID	Input number	Background number	P-Value	Corrected P-Value	Input	Hyperlink
Protein processing in endoplasmic reticulum	KEGG PATHWAY	ko04141	4	655	0.000418093	0.00668948	c91931_g1|c75193_g1|c80749_g2|c80749_g1	http://www.genome.jp/kegg-bin/show_pathway?ko04141/K09490%09red/K13993%09red/K03283%09red
Prion diseases	KEGG PATHWAY	ko05020	2	79	0.0009037	0.0072296	c80749_g2|c80749_g1	http://www.genome.jp/kegg-bin/show_pathway?ko05020/K09490%09red
Protein export	KEGG PATHWAY	ko03060	2	106	0.0015972	0.0085184	c80749_g2|c80749_g1	http://www.genome.jp/kegg-bin/show_pathway?ko03060/K09490%09red
Thyroid hormone synthesis	KEGG PATHWAY	ko04918	2	130	0.00237102	0.00948407	c80749_g2|c80749_g1	http://www.genome.jp/kegg-bin/show_pathway?ko04918/K09490%09red
RNA transport	KEGG PATHWAY	ko03013	2	393	0.0195605	0.0625936	c74595_g1|c81324_g1	http://www.genome.jp/kegg-bin/show_pathway?ko03013/K03243%09red
Measles	KEGG PATHWAY	ko05162	1	221	0.114691	0.203165	c91931_g1	http://www.genome.jp/kegg-bin/show_pathway?ko05162/K03283%09red
Legionellosis	KEGG PATHWAY	ko05134	1	228	0.118094	0.203165	c91931_g1	http://www.genome.jp/kegg-bin/show_pathway?ko05134/K03283%09red
Antigen processing and presentation	KEGG PATHWAY	ko04612	1	232	0.120033	0.203165	c91931_g1	http://www.genome.jp/kegg-bin/show_pathway?ko04612/K03283%09red
Toxoplasmosis	KEGG PATHWAY	ko05145	1	260	0.133493	0.203165	c91931_g1	http://www.genome.jp/kegg-bin/show_pathway?ko05145/K03283%09red
Estrogen signaling pathway	KEGG PATHWAY	ko04915	1	268	0.137303	0.203165	c91931_g1	http://www.genome.jp/kegg-bin/show_pathway?ko04915/K03283%09red
MAPK signaling pathway	KEGG PATHWAY	ko04010	1	273	0.139676	0.203165	c91931_g1	http://www.genome.jp/kegg-bin/show_pathway?ko04010/K03283%09red
Influenza A	KEGG PATHWAY	ko05164	1	315	0.159362	0.212483	c91931_g1	http://www.genome.jp/kegg-bin/show_pathway?ko05164/K03283%09red
Endocytosis	KEGG PATHWAY	ko04144	1	411	0.202754	0.245715	c91931_g1	http://www.genome.jp/kegg-bin/show_pathway?ko04144/K03283%09red
Epstein-Barr virus infection	KEGG PATHWAY	ko05169	1	439	0.215001	0.245715	c91931_g1	http://www.genome.jp/kegg-bin/show_pathway?ko05169/K03283%09red
Spliceosome	KEGG PATHWAY	ko03040	1	555	0.263848	0.281438	c91931_g1	http://www.genome.jp/kegg-bin/show_pathway?ko03040/K03283%09red
Ribosome	KEGG PATHWAY	ko03010	1	967	0.414895	0.414895	c65199_g2	http://www.genome.jp/kegg-bin/show_pathway?ko03010/K02932%09red
